# Supplementary material for: “As a patient I do not belong to the clinic, I belong to the community”: co-developing multi-level, person-centred tuberculosis stigma interventions in Cape Town, South Africa
Source: Springer Nature journal article supplement (doi:10.1186/s44263-024-00084-z), 2024-08-14

# Anticipated stigma about presenting for TB care

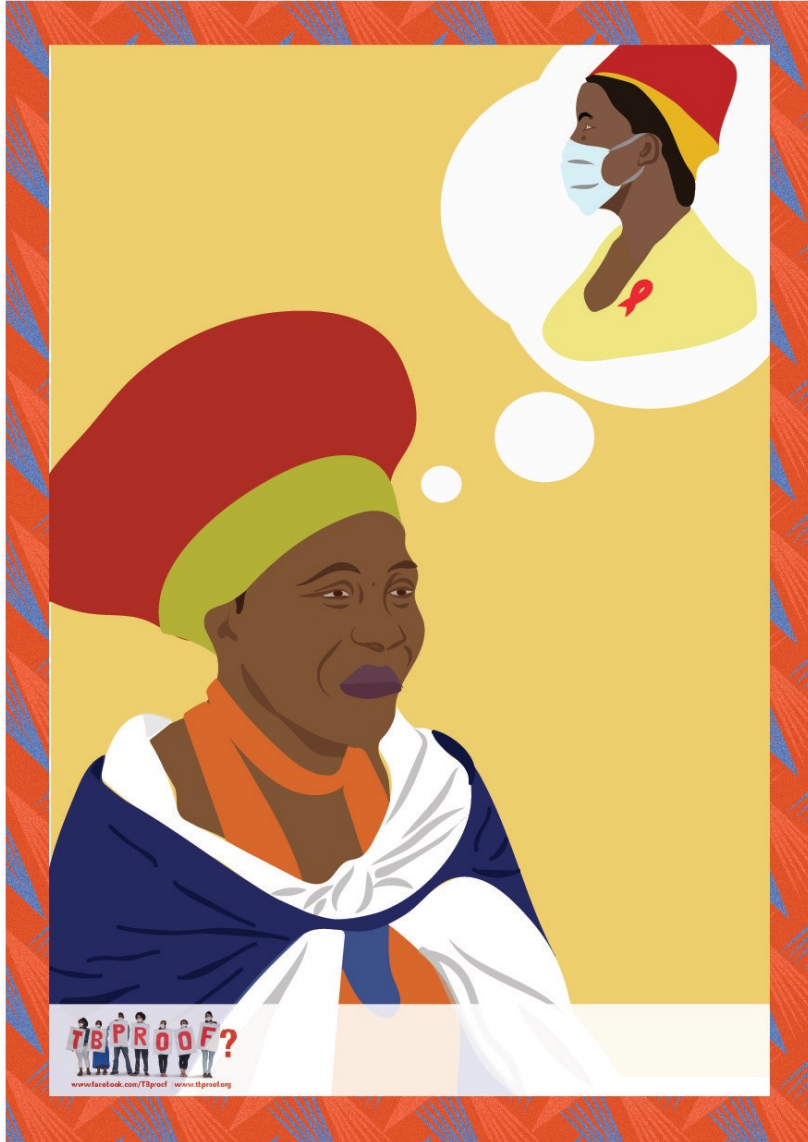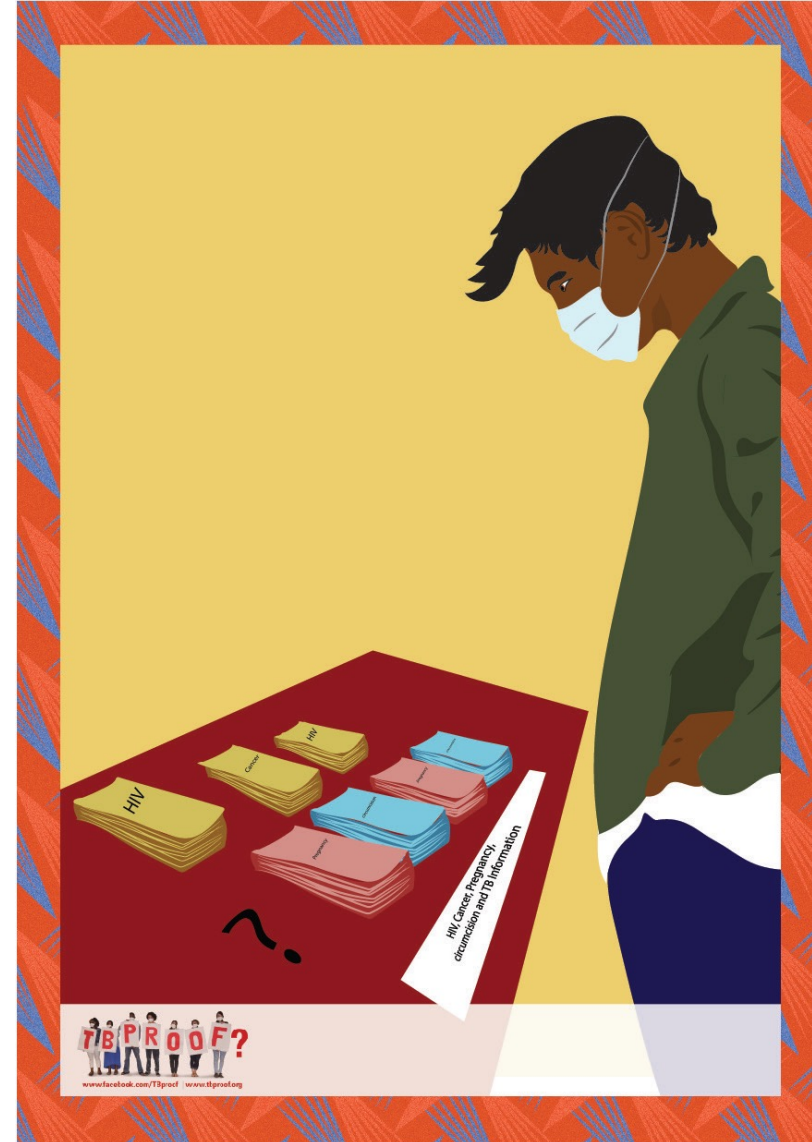

# Anticipated and enacted stigma related to masks

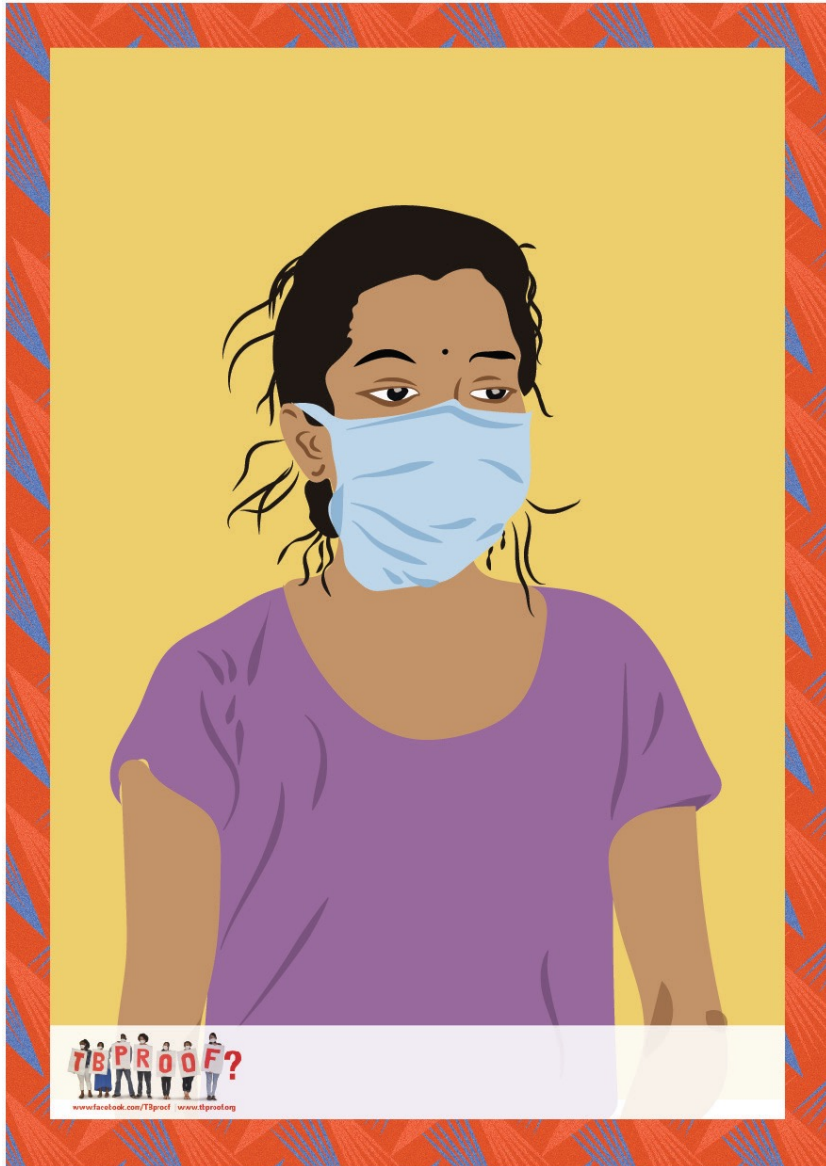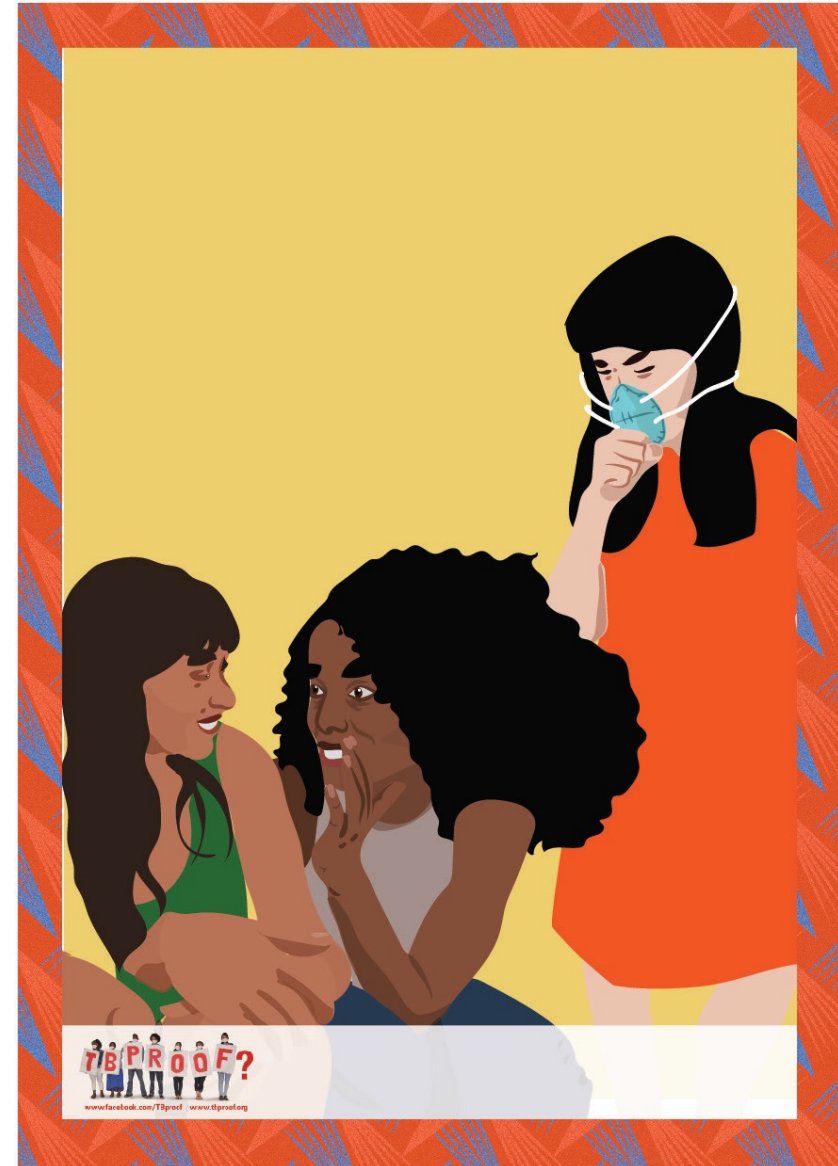

# Internal stigma experienced due to TB diagnosis

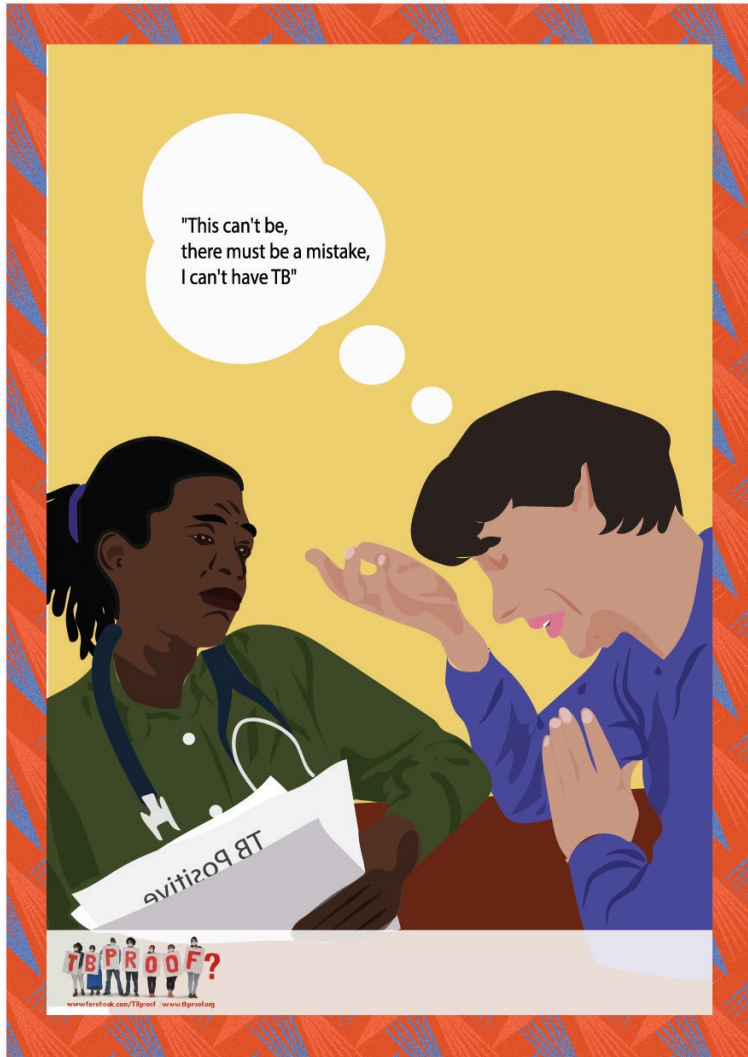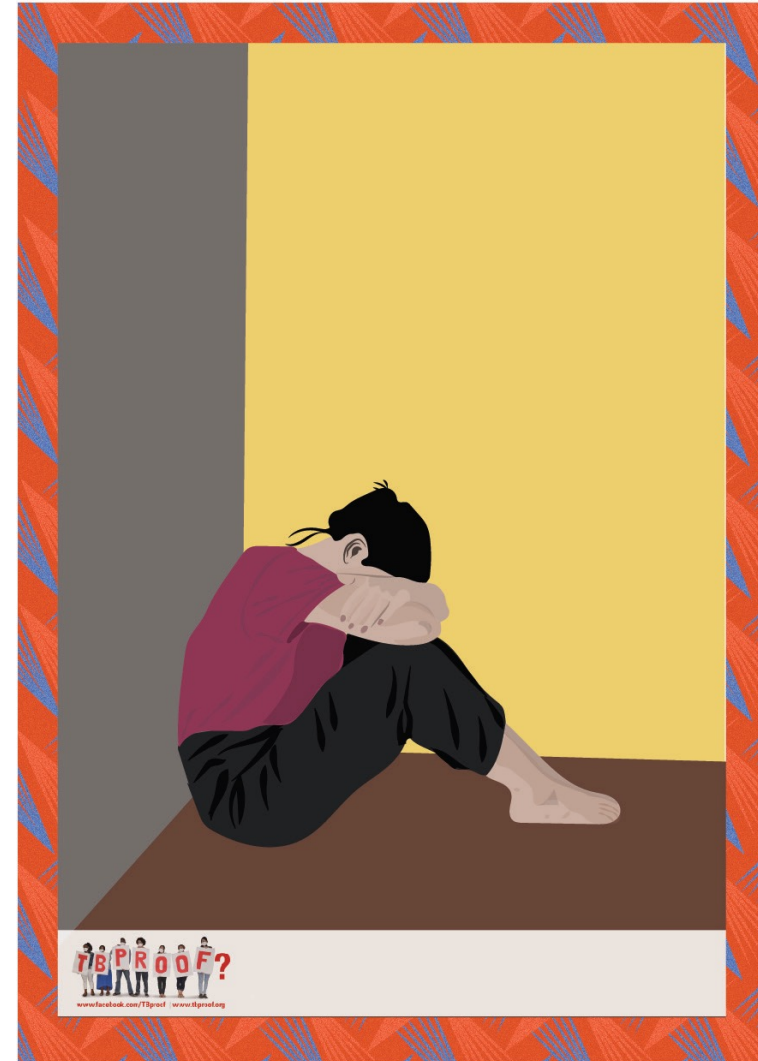



# Enacted stigma related to TB from health workers

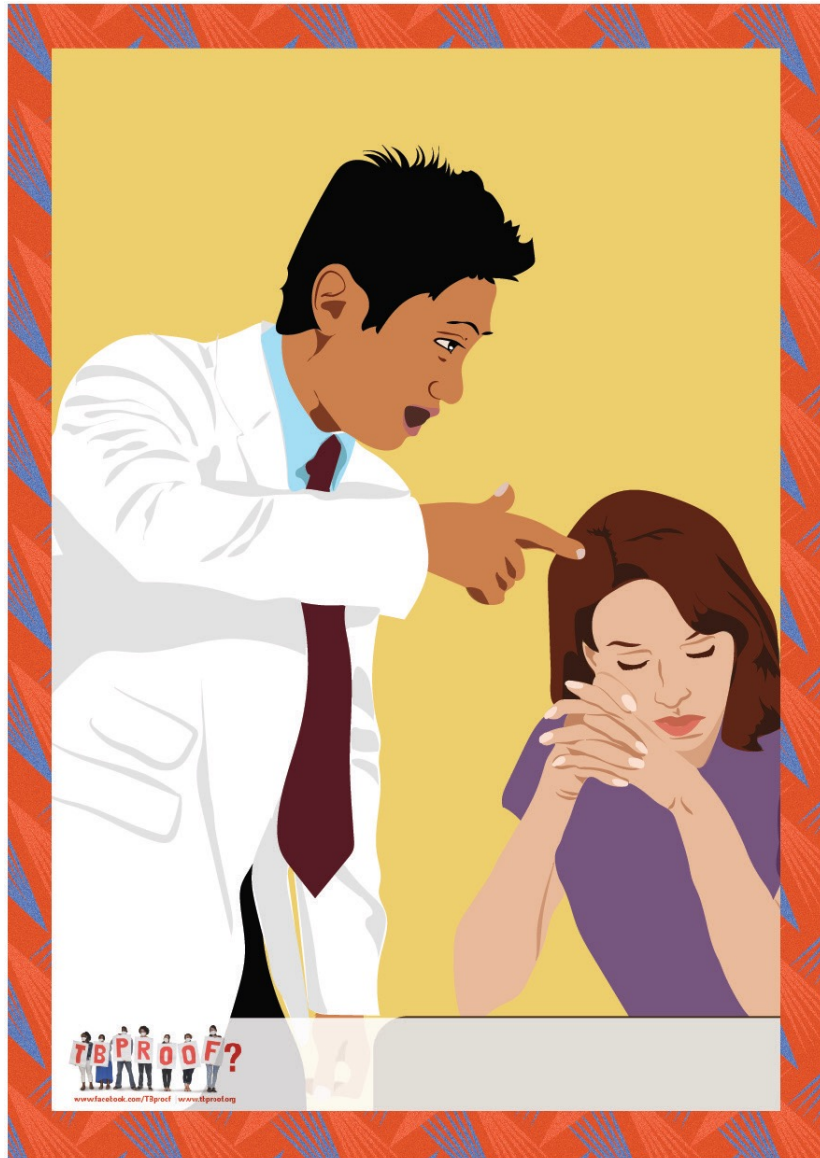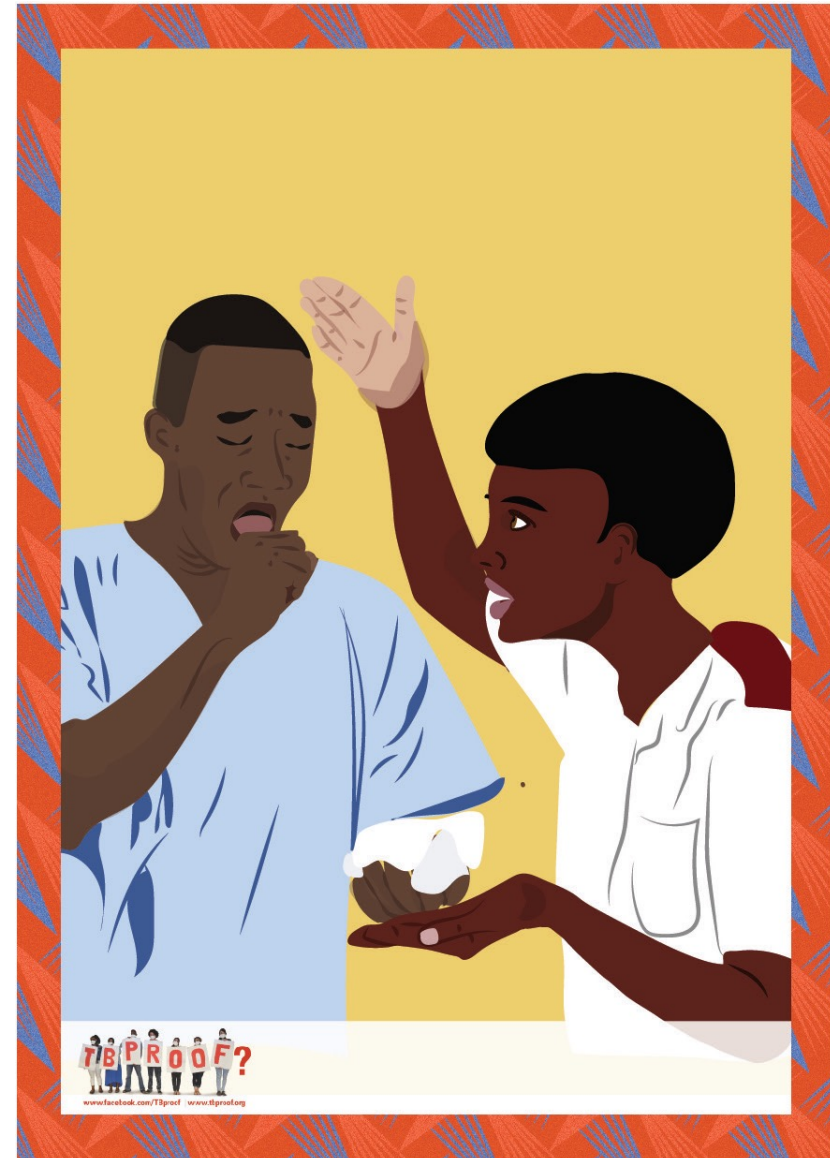

# Anticipated and enacted stigma from family related to disclosure and fear of infectiousness

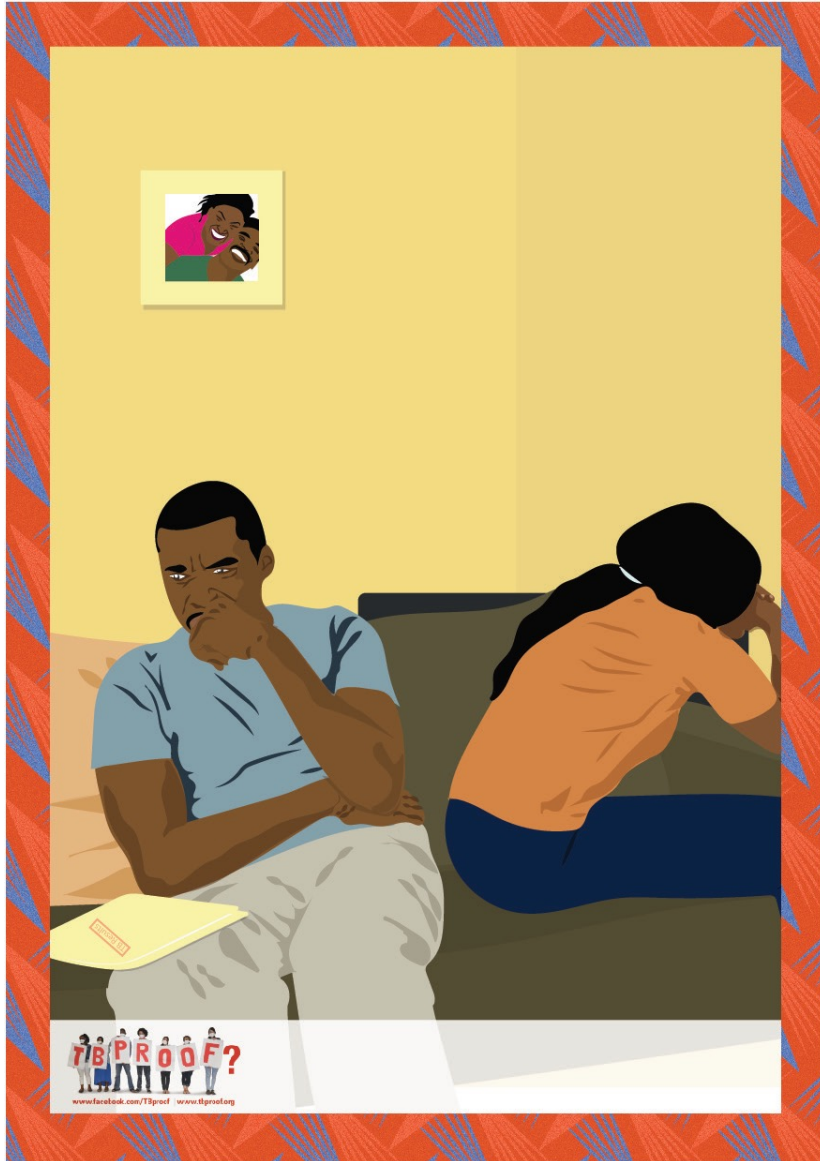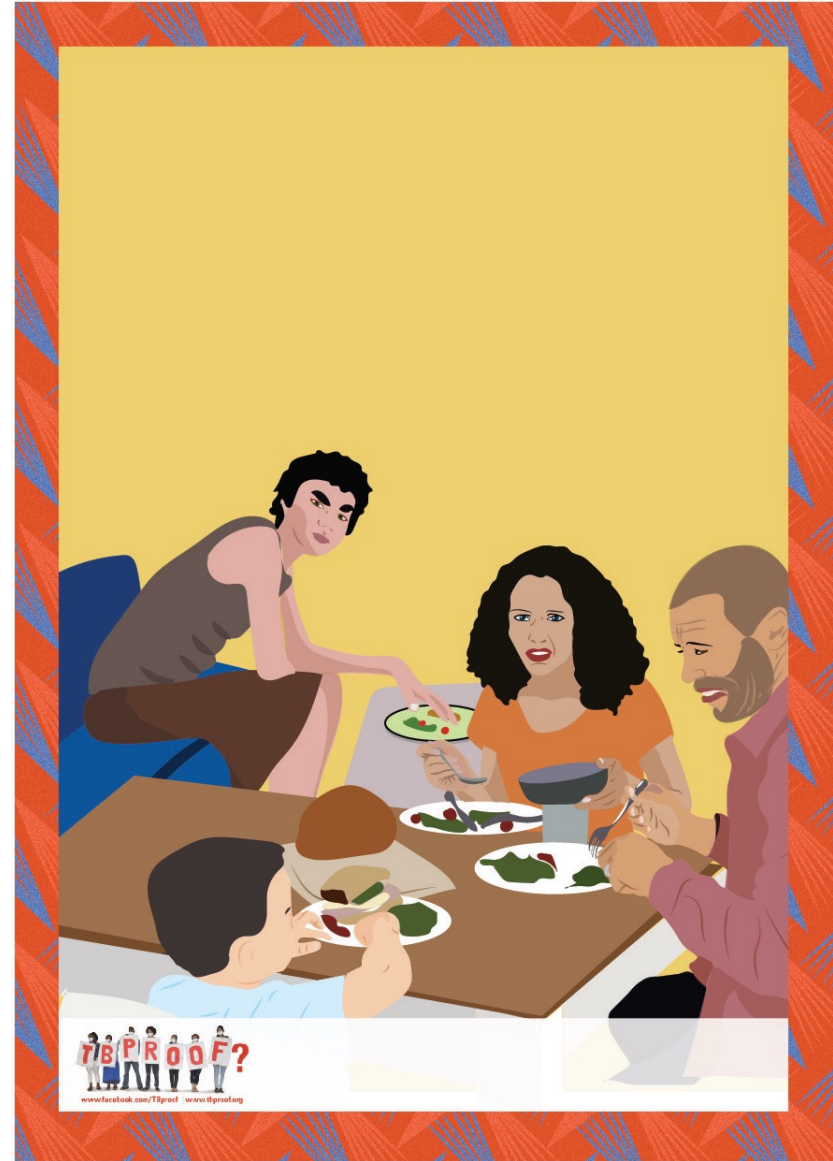



# Enacted stigma impacting jobs experienced by people with TB and by health workers caring for people with TB

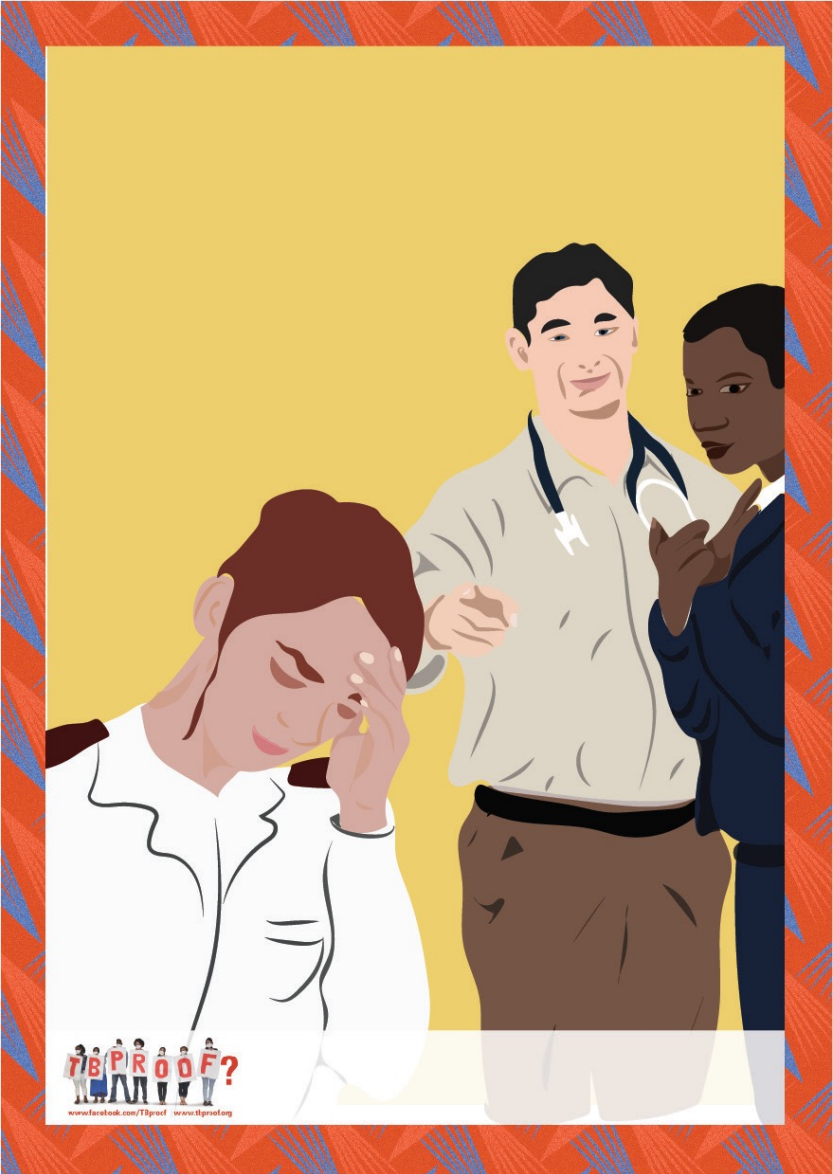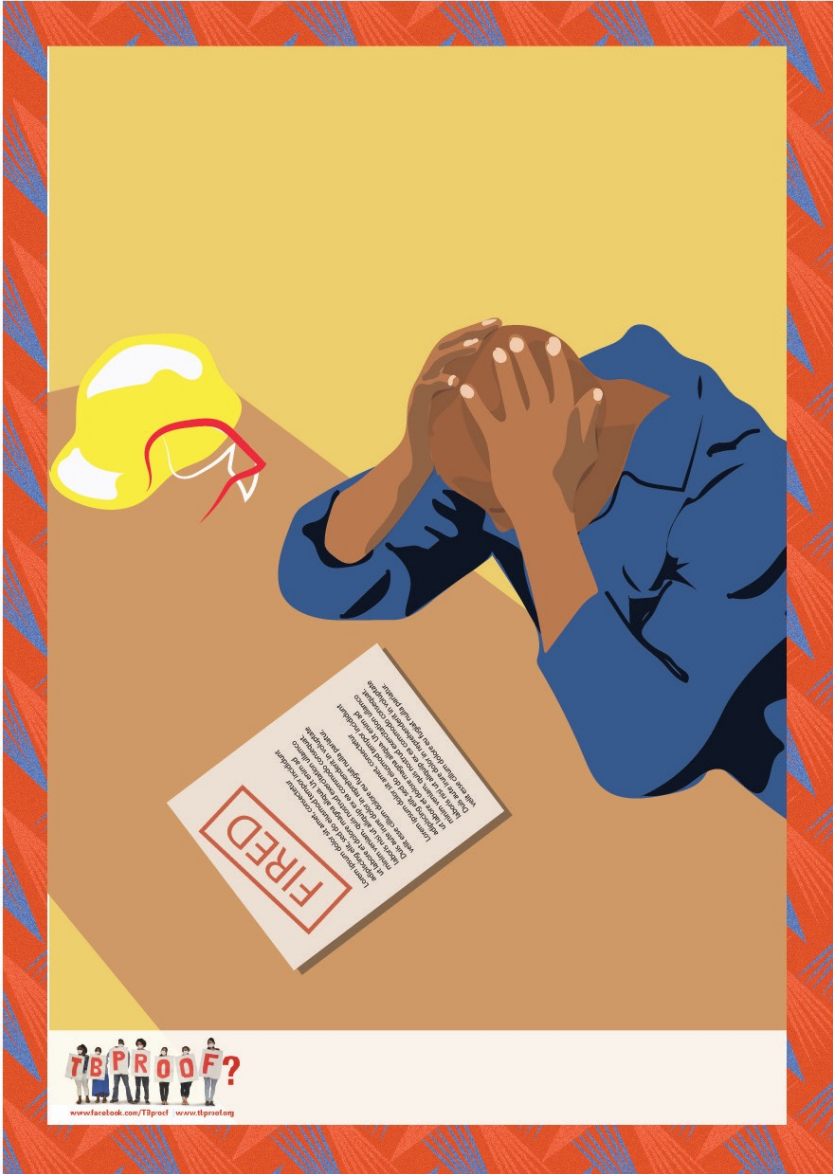

Supplement: MOESM2 [file 44263_2024_84_MOESM2_ESM.pdf]
