# Supplementary material for: “As a patient I do not belong to the clinic, I belong to the community”: co-developing multi-level, person-centred tuberculosis stigma interventions in Cape Town, South Africa
Source: Springer Nature journal article supplement (doi:10.1186/s44263-024-00084-z), 2024-08-14
Supplement: MOESM3 [file 44263_2024_84_MOESM3_ESM.docx]

**Additional File 3: Codebook**

| **Disclosure** |
| --- |
| To family |
| To friends |
| To workplace |
| **Examples of stigma mitigation** |
| Counselling |
| Education |
| Health system support |
| Peer support |
| Resilience |
| **Mental health** |
| Anxiety |
| Depression |
| Long-term impact |
| **STIGMA** |
| Anticipated |
| Enacted |
| Internal |
| Intersectional |
| Alcohol |
| Gender |
| HIV |
| Smoking |
| Substance use |
| **Stigma mitigation recommendation** |
| Counselling |
| Education |
| Health system support |
| Peer support |
| Resilience |
| Structural oppression |
